# Supplementary material for: Template-directed proton conduction pathways in a coordination framework
Source: Royal Society of Chemistry journal article supplement (doi:10.1039/c4ta01261e), 2014-01-01
Supplement: c4ta01261e1.pdf [file c4ta01261e1.pdf]

*Supporting information for*

**Template-directed proton conduction pathway in a coordination framework**

Munehiro Inukai, Satoshi Horike, Wenqian Chen, Daiki Umeyama, Tomoya Itakura, Susumu Kitagawa

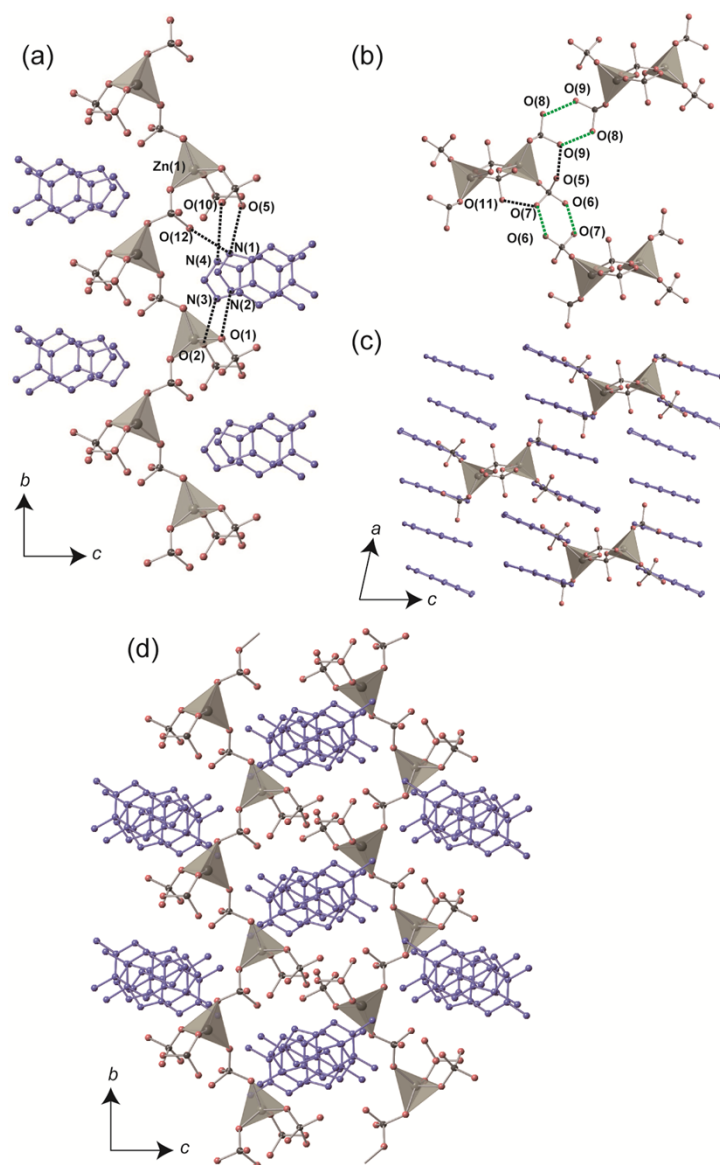

**Fig. S1** (a) Crystal structure of  $[\text{Zn}(\text{H}_2\text{PO}_4)_2(\text{HPO}_4)] \cdot (\text{H}_2\text{dmbim})_2$  (**1**) at  $-50\text{ }^\circ\text{C}$ . (b), (c) Three 1-D chains along  $b$  axis. (d) Packing structure of **1** along  $a$  axis. The  $\text{H}_2\text{dmbim}^+$  ions are highlighted as purple and hydrogen atoms were omitted. The  $\text{H}_2\text{dmbim}^+$  ions are omitted in (b). Intra- and intermolecular H-bonds are shown as dot line. In particular, interchain H-bonds are shown as green dot line. [Color coding: Grey: Zn and P, pink: O, purple: N and C.]

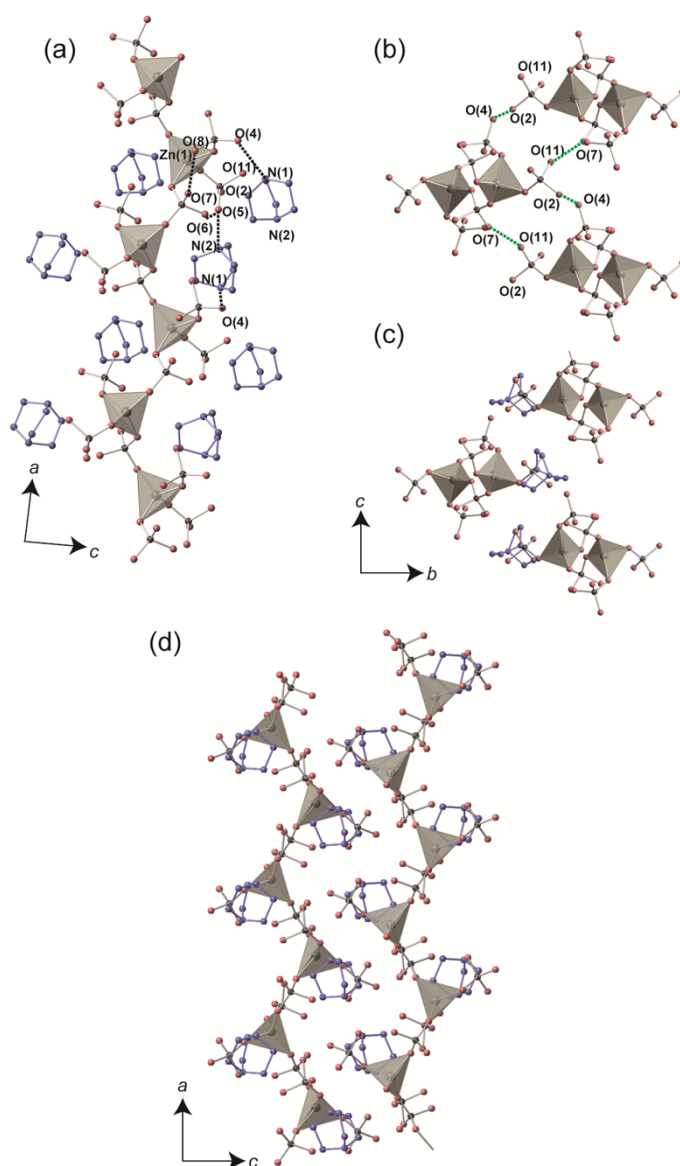

**Fig. S2** (a) Crystal structure of  $[\text{Zn}(\text{H}_2\text{PO}_4)_2(\text{HPO}_4)] \cdot \text{H}_2\text{dabco}$  (**2**). (b), (c) Three 1-D chains along  $a$  axis. (d) Packing structure of **2** along  $b$  axis. The  $\text{H}_2\text{dabco}^+$  ions are highlighted as purple and hydrogen atoms were omitted. The  $\text{H}_2\text{dabco}^+$  ions are omitted in (b). Intra- and intermolecular H-bonds are shown as dot line. In particular, interchain H-bonds are shown as green dot line. [Color coding: Grey: Zn and P, pink: O, purple: N and C.]

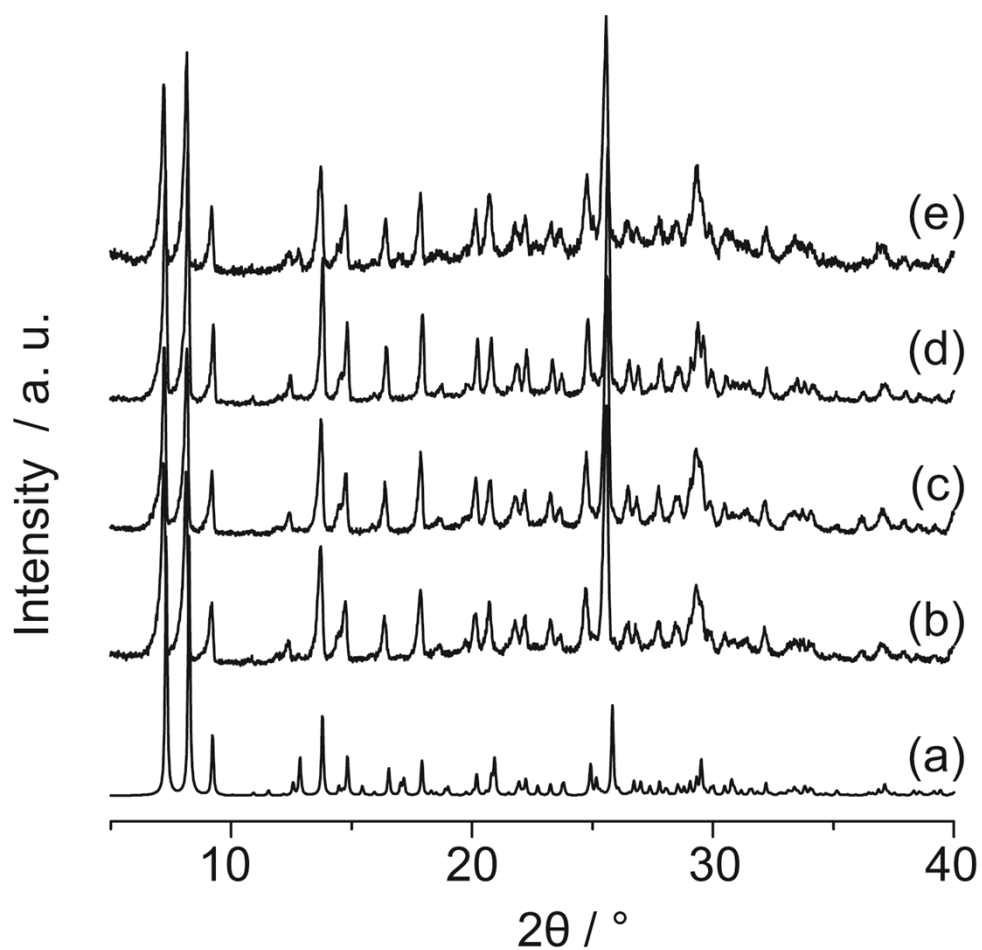

**Fig. S3** Powder X-ray diffraction patterns of (a) simulation from the crystal structure of **1**, (b) **1**, (c) deuterated **1** (**1-d**), (d) **1** after humidity exposure (80 °C and 80% relative humidity), and (e) **1** after impedance measurement.

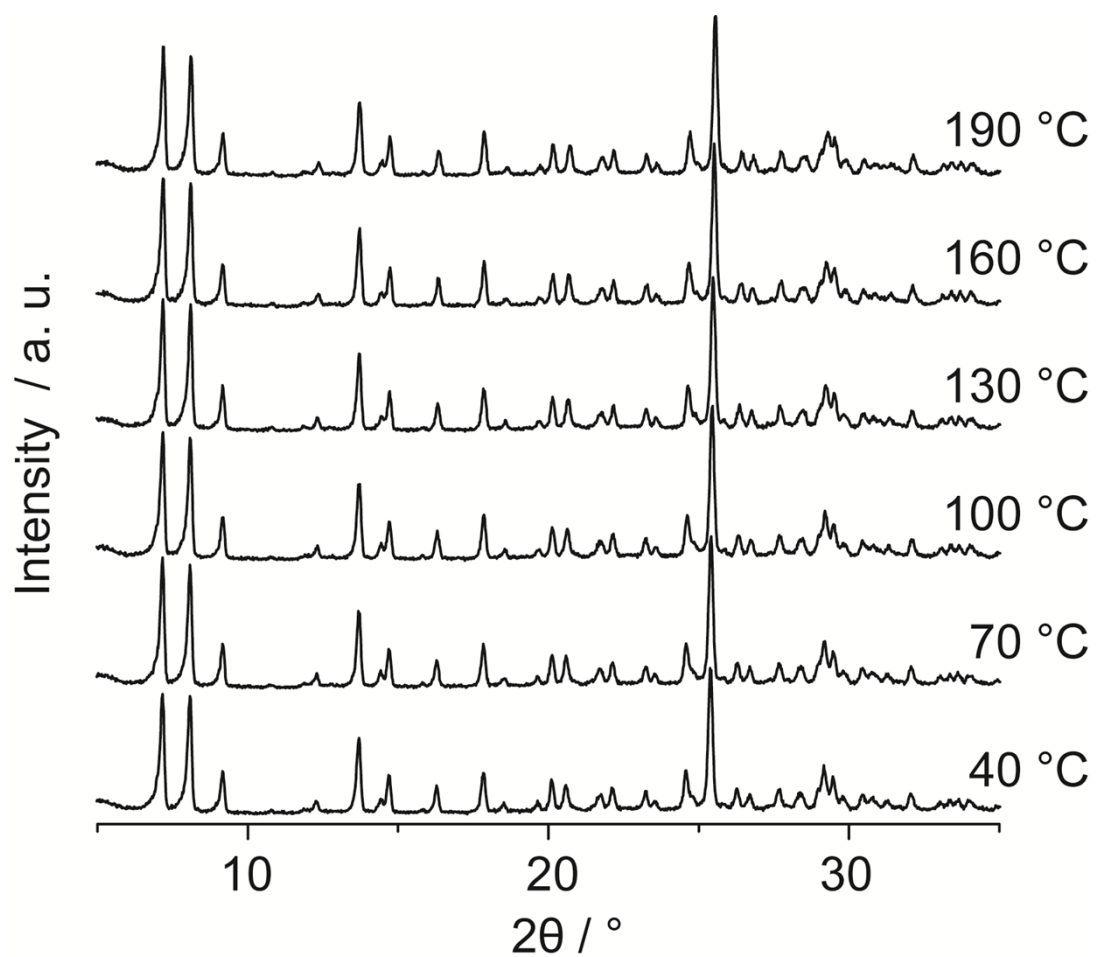

**Fig. S4** Powder X-ray diffraction patterns of **1** from 40 to 190 °C under N<sub>2</sub> atmosphere.

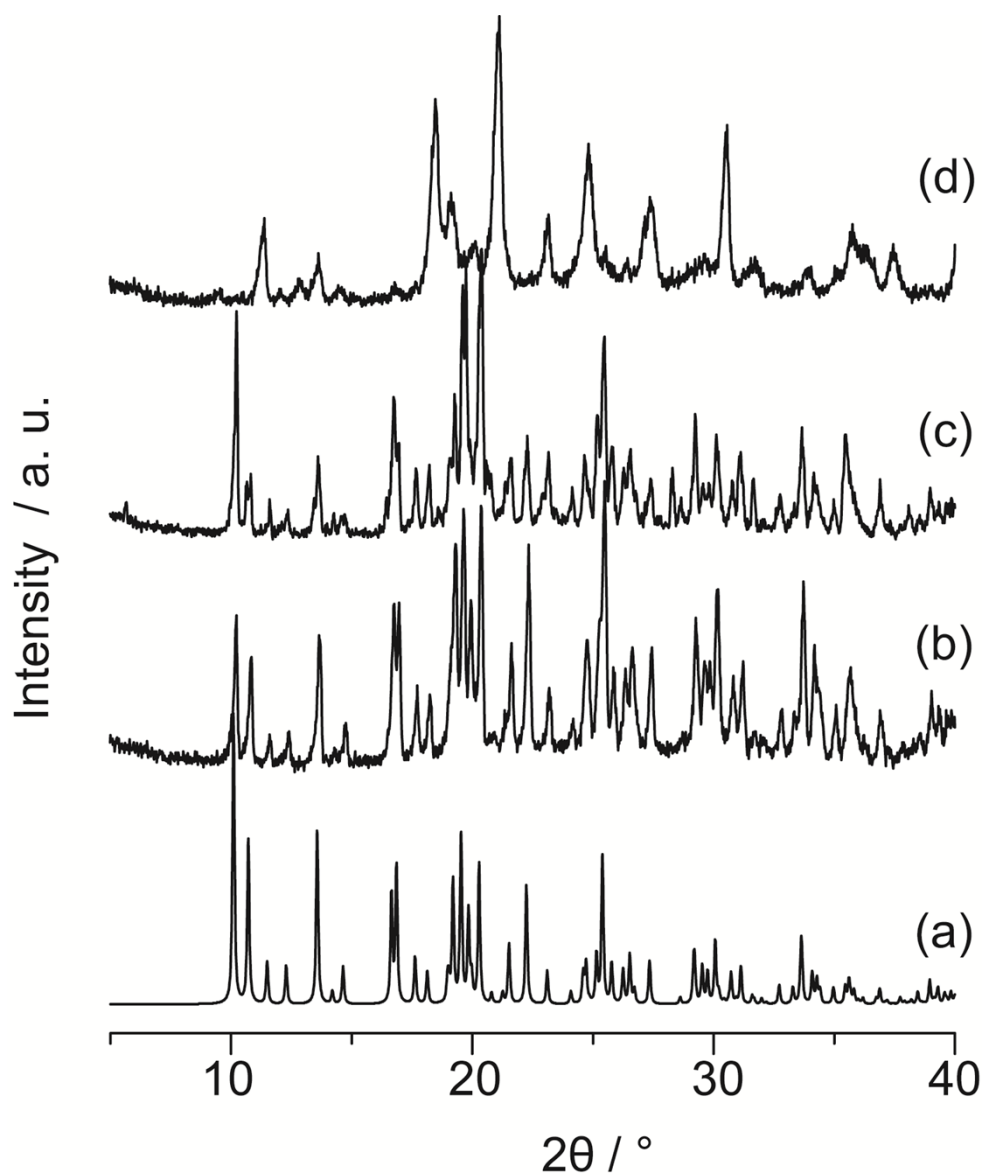

**Fig. S5** Powder X-ray diffraction patterns of (a) simulation from the crystal structure of **2**, (b) **2**, (c) **2** after humidity exposure (80 °C and 80% relative humidity), and (d) **2** after heating at 180 °C for 6 h under N<sub>2</sub> flow.

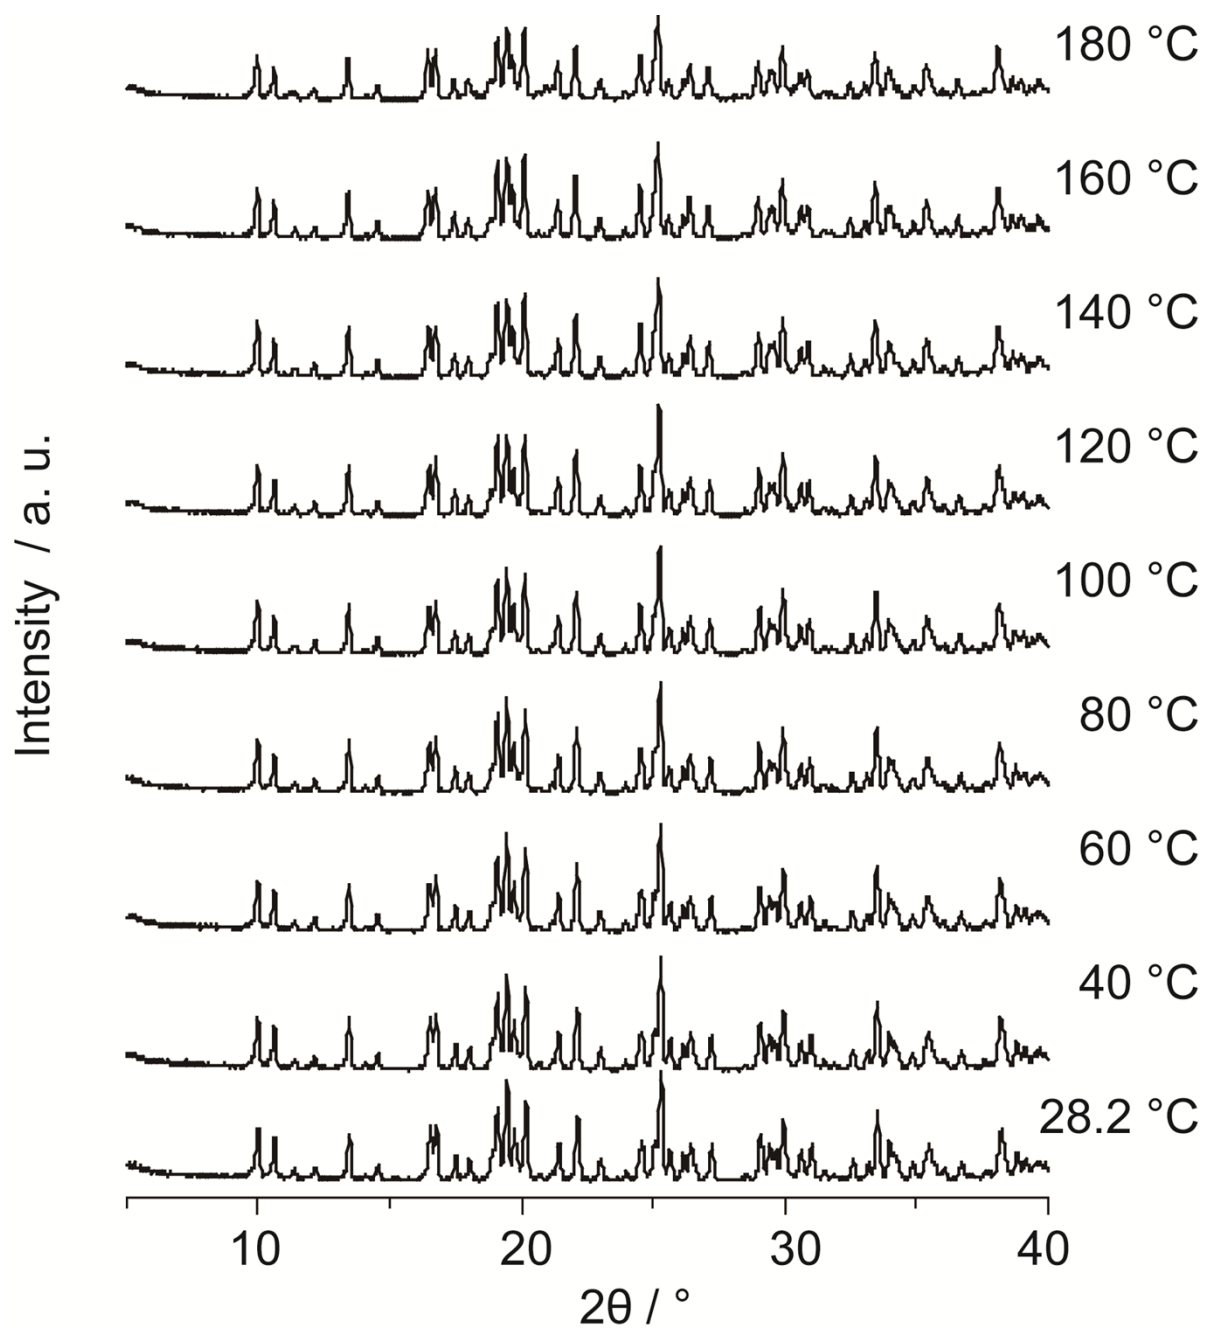

**Fig. S6** Powder X-ray diffraction patterns of **2** from 28 °C to 180 °C under N<sub>2</sub> atmosphere.

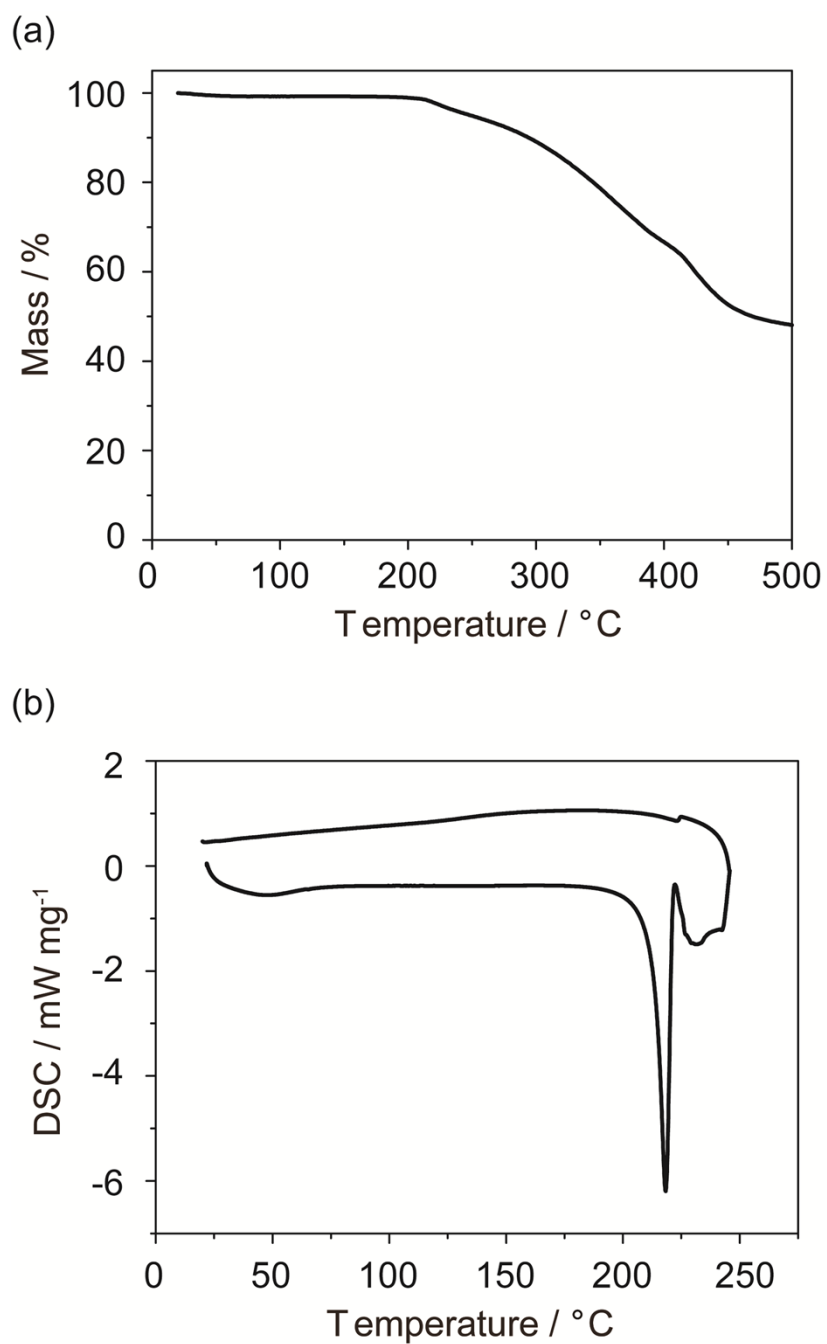

**Fig. S7** (a) Thermogravimetric analysis (TGA) of **1** from 25 °C to 500 °C and (b) differential scanning calorimetry (DSC) profile of **1** from 20 °C to 250 °C.

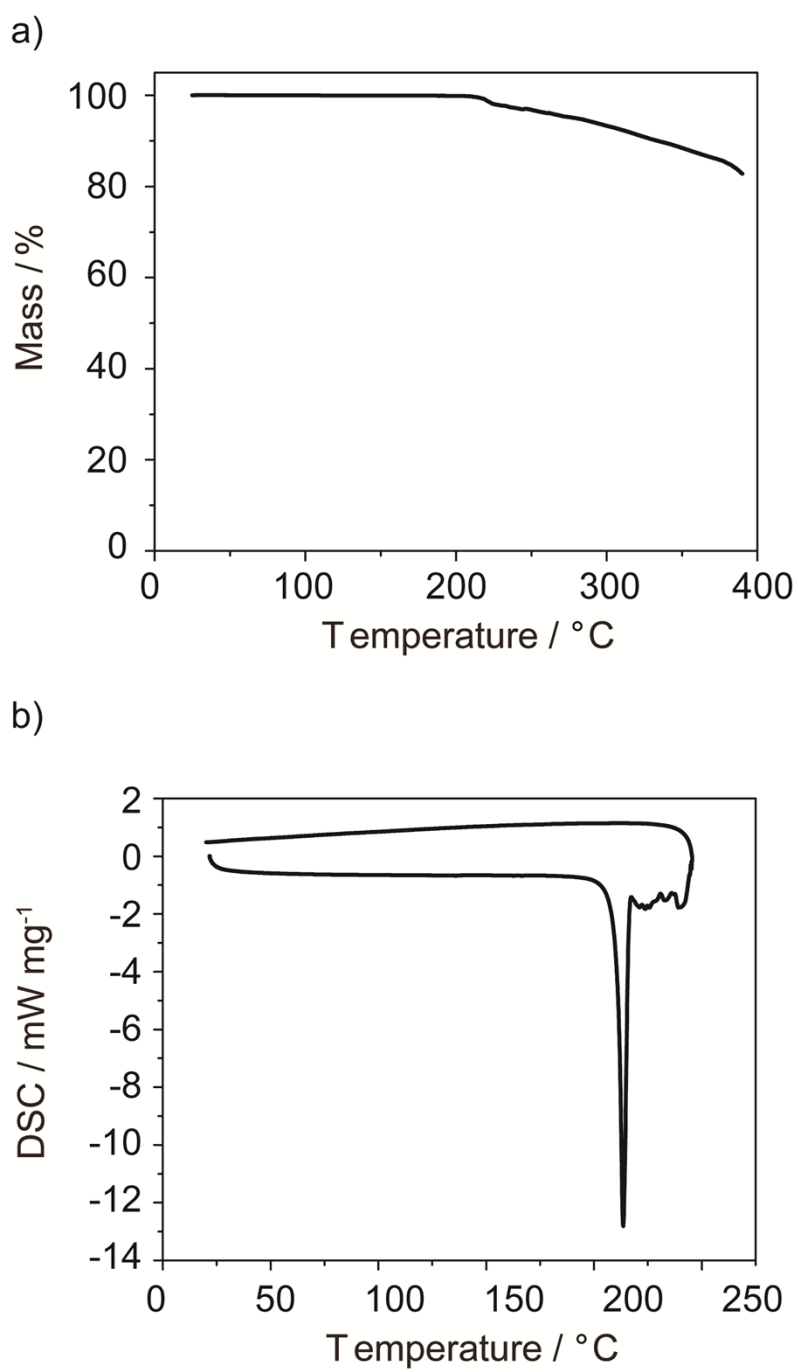

**Fig. S8** (a) TGA of **2** from 25 to 400 °C and (b) DSC profile of **2** from 20 °C to 250 °C.

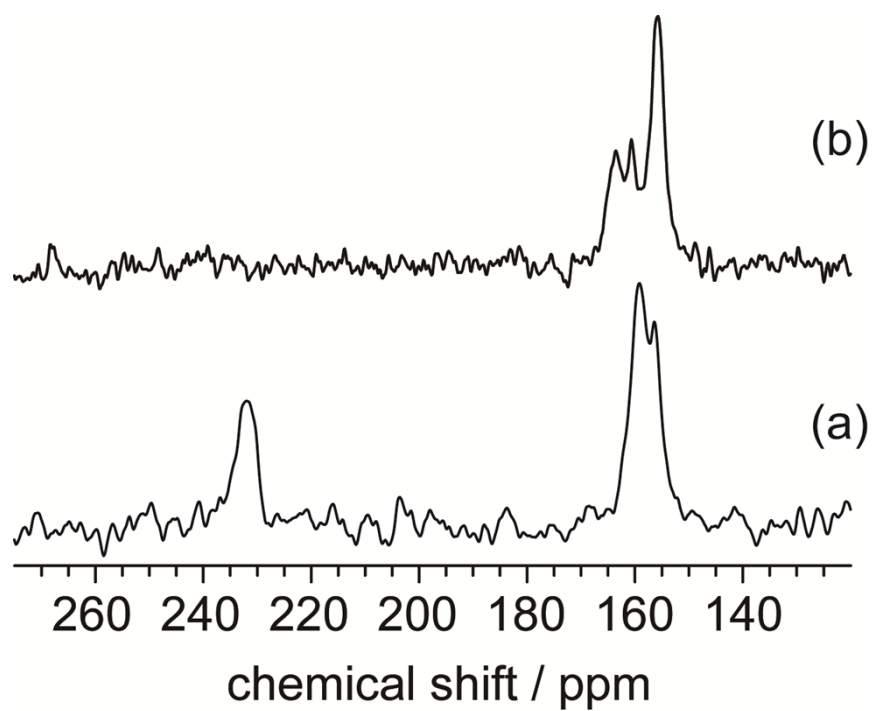

**Fig. S9**  $^{15}\text{N}$  CPMAS spectra of (a) 5,6-dimethylbenzimidazole (Hdmbim) and (b) **1** at room temperature.

## References

- (a) M. Munowitz; W. W. Bachovchin; J. Herzfeld; C. M. Dobson; R. G. Griffin, *J. Am. Chem. Soc.* **1982**, 104, 1192–1196; (b) S. Farr-Jones; W. Y. L. Wong; W. G. Gutheil; W. W. Bachovchin, *J. Am. Chem. Soc.* **1993**, 115, 6813–6819.

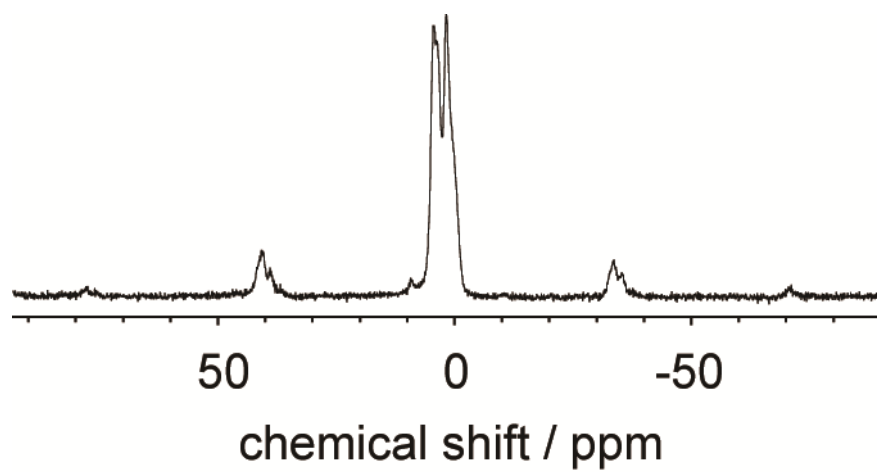

**Fig. S10**  $^{31}\text{P}$  MAS spectrum of **1** at room temperature. The spectrum does not show a peak at 0 ppm which is assigned to  $\text{H}_3\text{PO}_4$ , suggesting the absence of residual  $\text{H}_3\text{PO}_4$

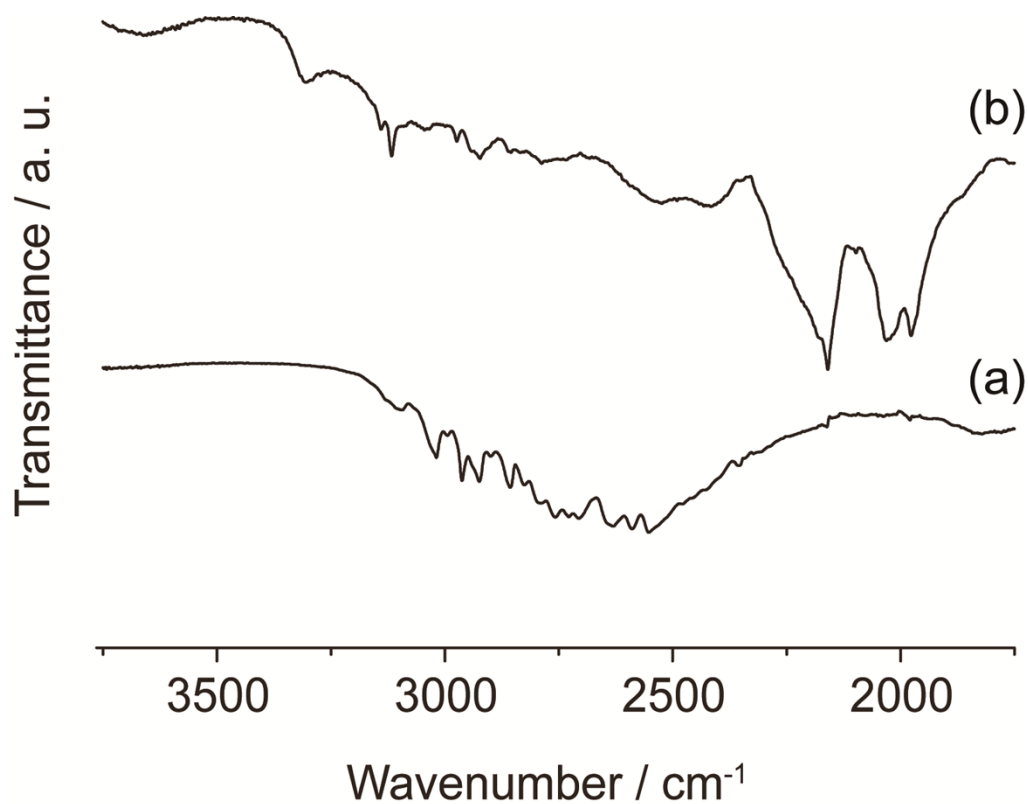

**Fig. S11** Infra-red (IR) spectra of (a) Hdmbim and (b) **1** at room temperature. These spectra show N-H stretch band at 2500-3500  $\text{cm}^{-1}$ .

## References

(a) M. Yamada; I. Honma, *Angew. Chem, Int. Ed.* **2004**, 43, 3688-3691; (b) M. Nakayama; Y. Sugiura; T. Hayakawa; M. Nogami, *Phys. Chem. Chem. Phys.* **2011**, 13, 9439-9444.

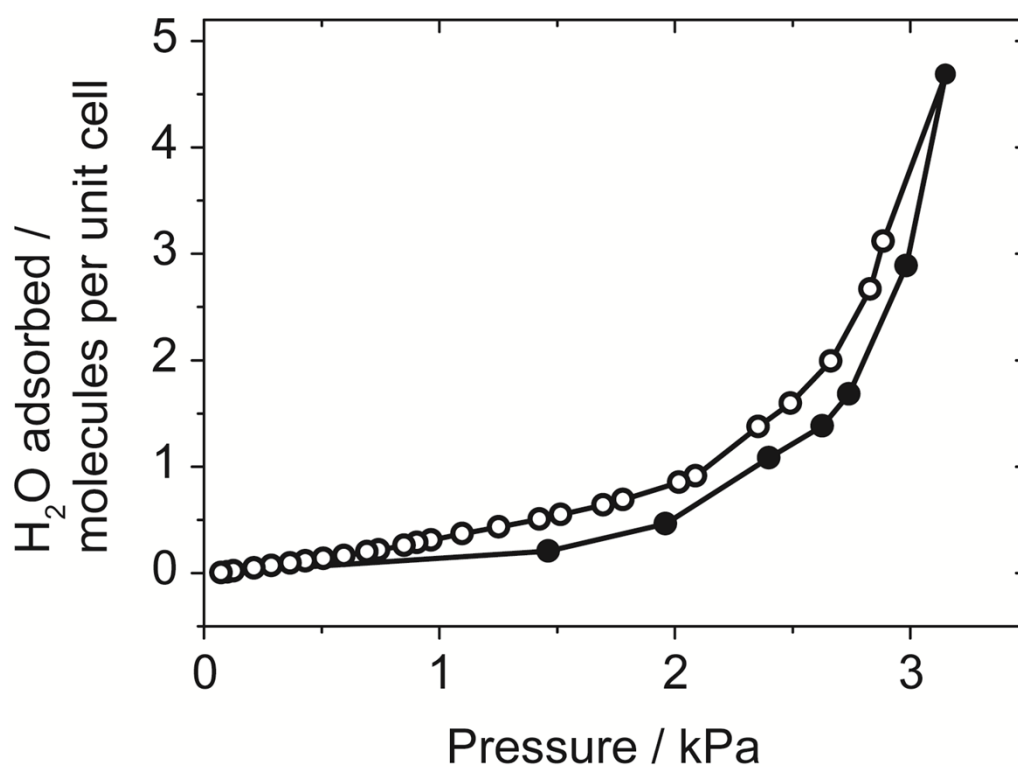

**Fig. S12** Adsorption isotherm (closed circles) and desorption isotherm (open circles) of H<sub>2</sub>O at 298 K for **1**. The sorption isotherm shows low adsorption and desorption up take until around 2 kPa, suggesting hydrophobicity.

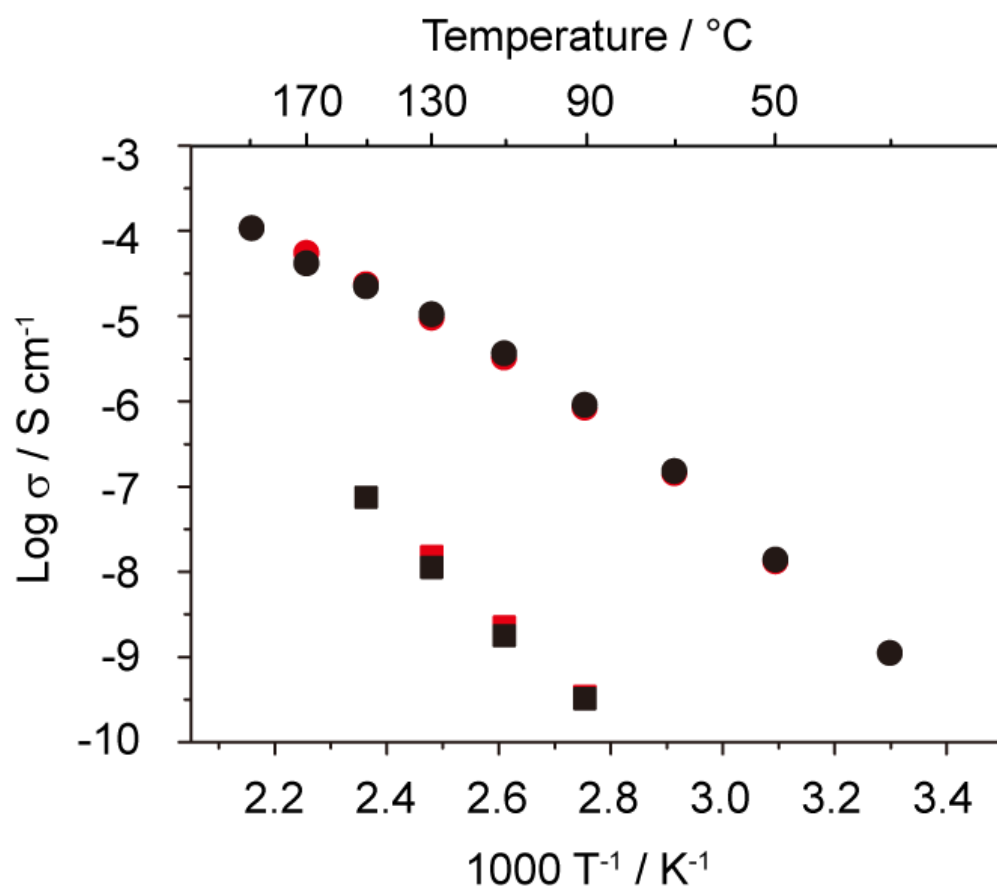

**Fig. S13** Arrhenius plots of anhydrous conductivity of **1** in 30–190 °C (circle) and **2** in 90–150 °C (square). Black and Red indicate cooling and heating regime. The proton conductivities in cooling regime are almost coincident with the conductivities in heating process. This indicates thermal stability and reproducibility of proton conduction. The conductivities shown in Fig. 2a are that in heating process.

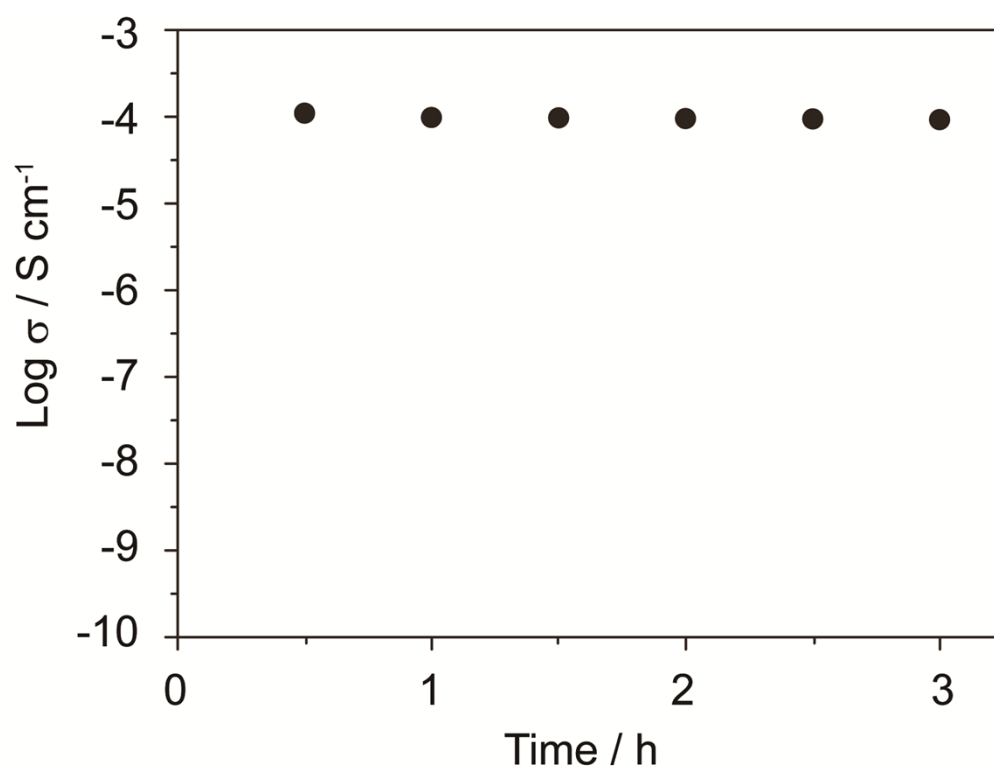

**Fig. S14** Time dependence of conductivity of **1** at 190 °C.

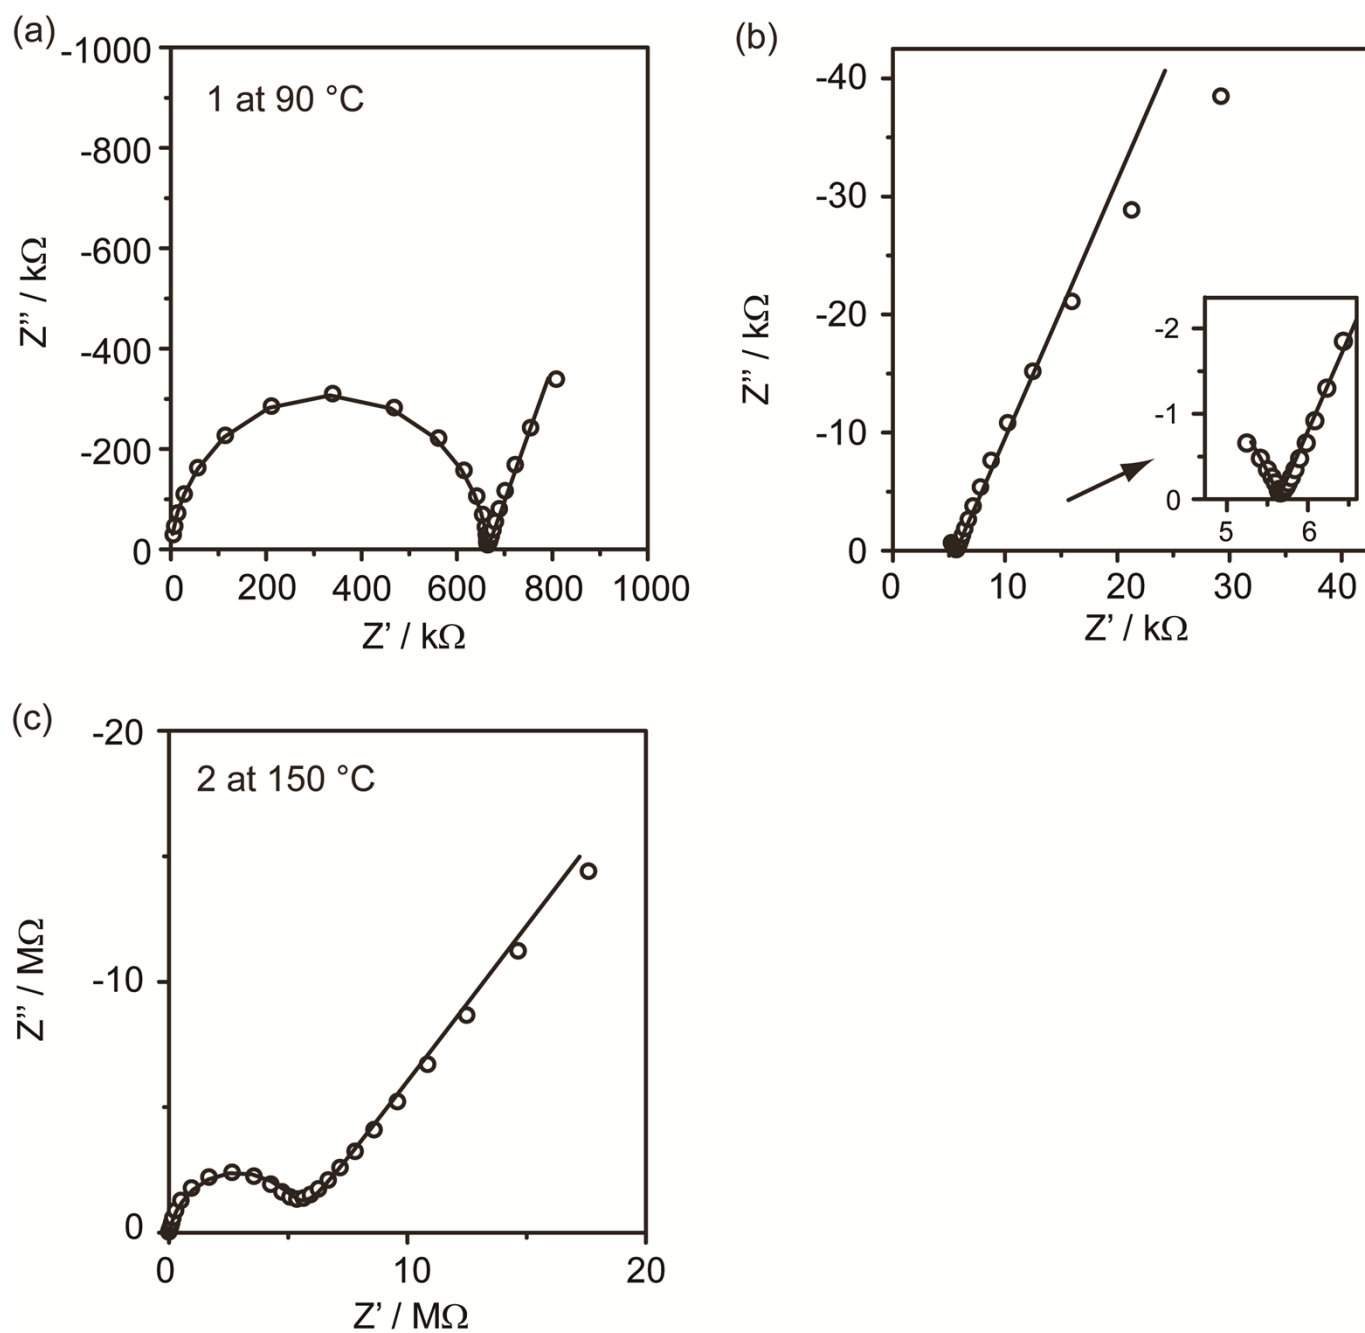

**Fig. S15** Nyquist plots of **1** (a) at 90 and (b) 190 °C, and (c) **2** of 150 °C. Circles and lines represent experimental data and simulated values from equivalent circuit  $(R_bCPE_b)(CPE_{el})$ .

**Table S1** Crystallographic data for **1** at -50 and 130 °C.

| Formula                 | [Zn(H <sub>2</sub> PO <sub>4</sub> ) <sub>2</sub> (HPO <sub>4</sub> )]·(dmbimH <sub>2</sub> ) <sub>2</sub> | [Zn(H <sub>2</sub> PO <sub>4</sub> ) <sub>2</sub> (HPO <sub>4</sub> )]·(dmbimH <sub>2</sub> ) <sub>2</sub> |
|-------------------------|------------------------------------------------------------------------------------------------------------|------------------------------------------------------------------------------------------------------------|
| CCDC                    | 948865                                                                                                     | 948866                                                                                                     |
| Deposition<br>number    |                                                                                                            |                                                                                                            |
| Temperature             | -50 °C                                                                                                     | 130 °C                                                                                                     |
| Space Group             | Monoclinic P 2 <sub>1</sub> / n                                                                            | Monoclinic P 2 <sub>1</sub> / n                                                                            |
| <i>a</i> / Å            | 14.184(4)                                                                                                  | 14.392(3)                                                                                                  |
| <i>b</i> / Å            | 9.890(2)                                                                                                   | 9.901(2)                                                                                                   |
| <i>c</i> / Å            | 19.307(5)                                                                                                  | 19.266(4)                                                                                                  |
| <i>α</i> / °            | 90                                                                                                         | 90                                                                                                         |
| <i>β</i> / °            | 97.307(4)                                                                                                  | 97.337(4)                                                                                                  |
| <i>γ</i> / °            | 90                                                                                                         | 90                                                                                                         |
| Volume / Å <sup>3</sup> | 2686.5(12)                                                                                                 | 2722.8(10)                                                                                                 |
| <i>Z</i>                | 4                                                                                                          | 4                                                                                                          |
| <i>R</i>                | 0.0775                                                                                                     | 0.0709                                                                                                     |
| <i>R</i> <sub>w</sub>   | 0.2061                                                                                                     | 0.2013                                                                                                     |
| GOF                     | 1.100                                                                                                      | 0.930                                                                                                      |

**Table S2** Inter- and intramolecular H-bond lengths [Å] for 1 at -50 and 130 °C.

| Temperature | -50 °C | 130 °C |
|-------------|--------|--------|
| N(1)-O(5)   | 3.038  | 3.143  |
| N(1)-O(12)  | 3.003  | 3.030  |
| N(2)-O(1)   | 2.887  | 2.890  |
| N(3)-O(2)   | 2.790  | 2.800  |
| N(4)-O(10)  | 2.699  | 2.706  |
| O(6)-O(7)   | 2.548  | 2.564  |
| O(8)-O(9)   | 2.582  | 2.599  |
| O(5)-O(9)   | 2.526  | 2.537  |
| O(7)-O(11)  | 2.604  | 2.622  |

**Table S3** Inter- and intramolecular H-bond lengths [Å] for **2**.

|            |       |
|------------|-------|
| N(1)-O(4)  | 2.717 |
| N(2)-O(5)  | 2.603 |
| O(2)-O(4)  | 2.610 |
| O(7)-O(11) | 2.534 |
| O(5)-O(6)  | 2.578 |
| O(7)-O(8)  | 2.517 |
